# Supplementary material
Source: PubMed Central journal article supplement (PMC2556877)
Supplement: NIHMS60931-supplement-si20051024_023.pdf [file NIHMS60931-supplement-si20051024_023.pdf]

## Supplemental Material

Figure S1

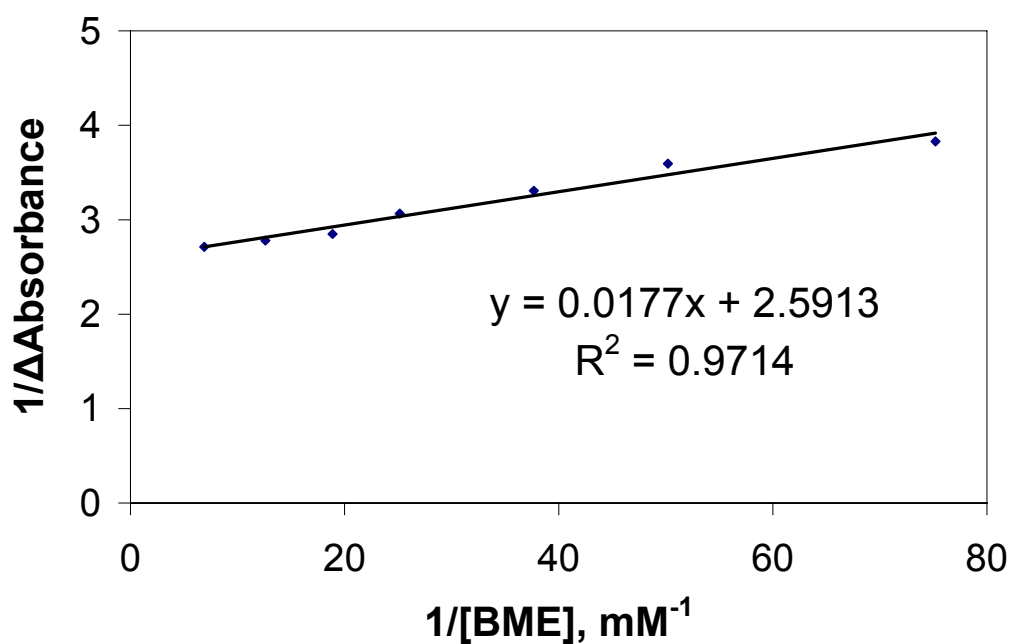

Figure S1. Double reciprocal plot for BME binding to ferric H93G Mb, based on the saturation titration. For  $K_d$  calculations  $1/\Delta A = (K_d / \Delta A_\infty)1/[S] + 1/ \Delta A_\infty$  and X intercept is  $-1/K_d$ . In this plot, X intercept is equal to  $-147 \text{ mM}^{-1}$ , thus  $K_d$  is equal to  $6.8 \mu\text{M}$

The titration data for BME binding to ferric H93G Mb were analyzed using the double reciprocal plot (Figure S1), which yielded a straight line with an X-axis intercept value of  $1/[\text{BME}]_{\text{free}} = -147 \text{ mM}^{-1}$ , indicating that ferric H93G Mb and BME form a 1:1 (mol/mol) complex with a  $K_d$  value of  $\sim 7 \mu\text{M}$ .

Figure S2

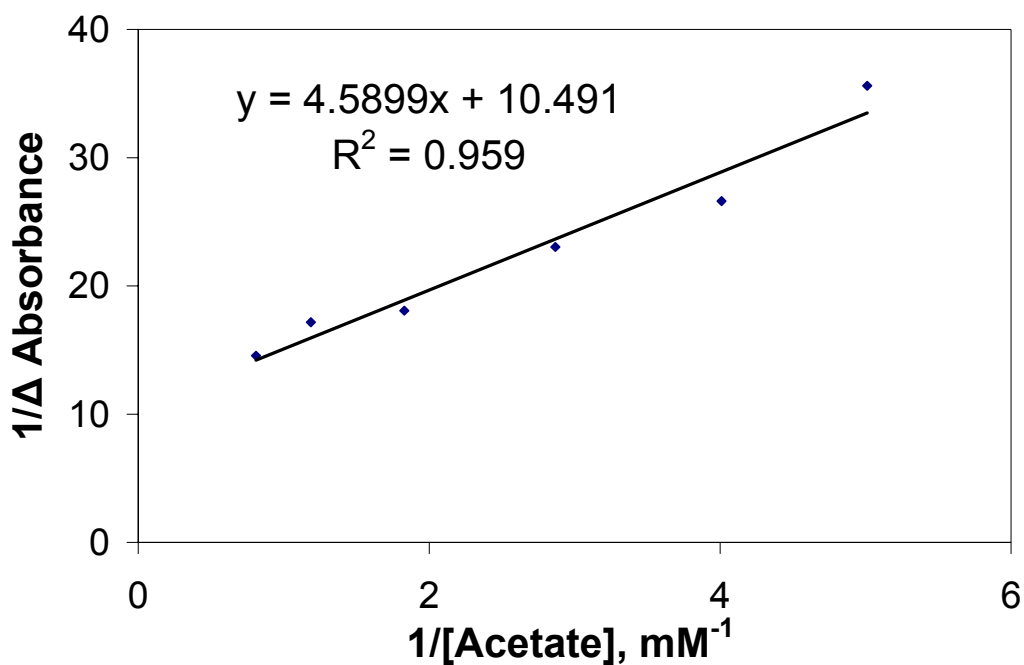

Figure S2. Double reciprocal plot for acetate binding to ferric H93G Mb, based on the saturation titration. For  $K_d$  calculation  $1/\Delta A = (K_d/\Delta A_\infty)1/[S] + 1/\Delta A_\infty$  and X intercept is  $-1/K_d$ . In this plot, X intercept is equal to  $-2.286 \text{ mM}^{-1}$ , thus  $K_d$  is equal to  $440 \mu\text{M}$

The titration data for acetate binding to ferric H93G Mb were analyzed using the double reciprocal plot (Figure S2), which yielded a straight line with an X-axis intercept value of  $1/[\text{acetate}]_{\text{free}} = -2.286 \text{ mM}^{-1}$ , indicating that ferric H93G Mb and acetate form a 1:1 (mol/mol) complex with a  $K_d$  value of  $440 \mu\text{M}$ .
